# Supplementary material
Source: PubMed Central journal article supplement (PMC9132767)
Supplement: NIHMS1805084-supplement-Supplemental_Materials.pdf [file NIHMS1805084-supplement-Supplemental_Materials.pdf]

**SUPPLEMENTAL MATERIALS**

**Supplemental Figure 1. Proportion of myocarditis among patients with MINOCA undergoing CMR based on the threshold angiographic diameter stenosis employed, after excluding participants who did not undergo CMR.**

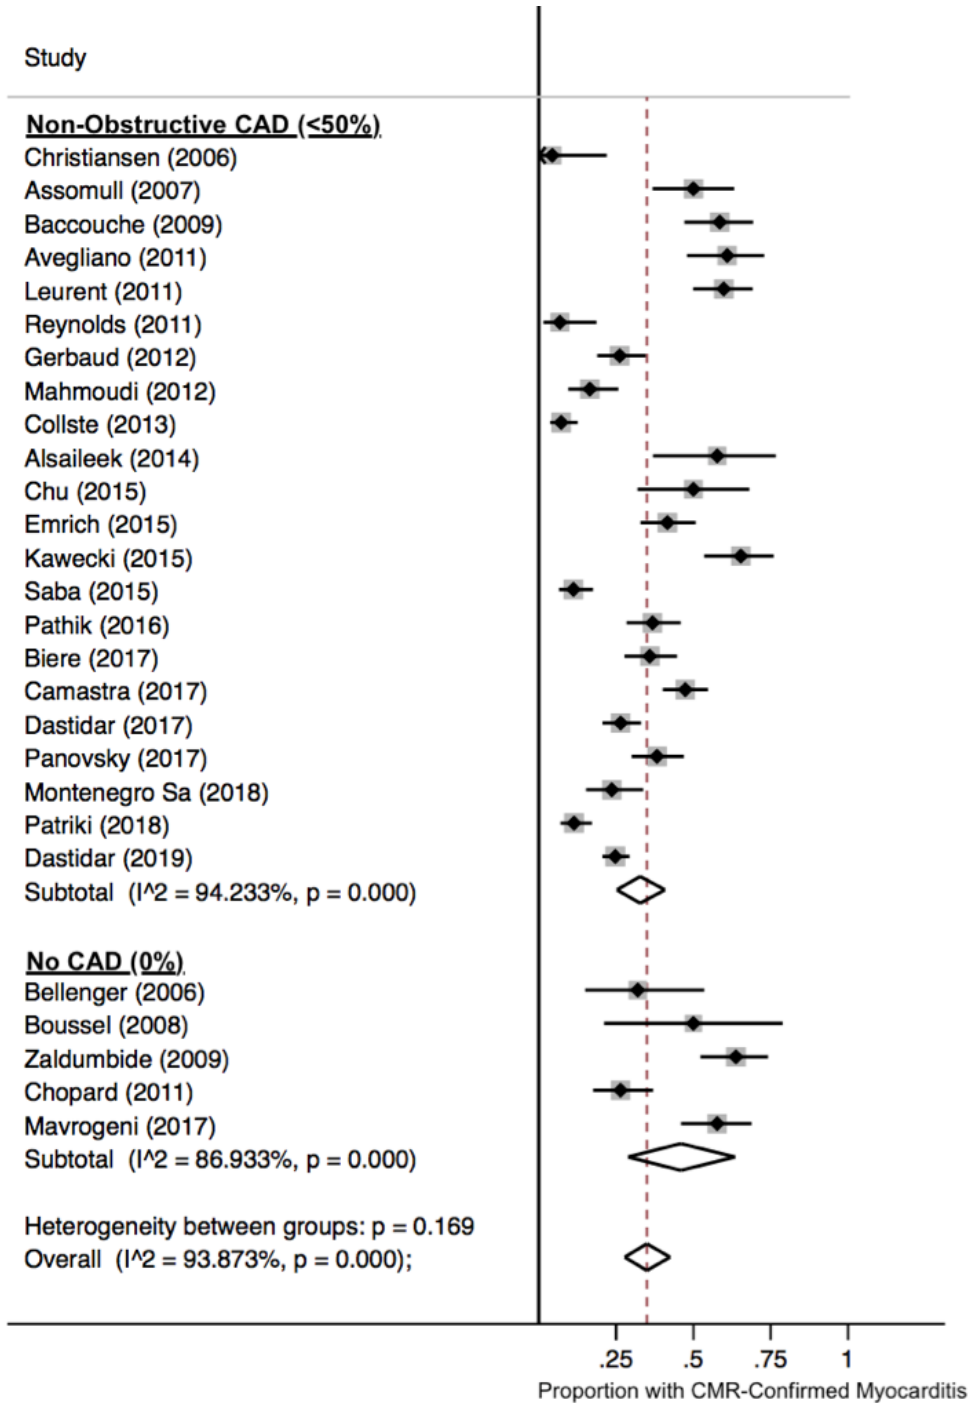

**Supplemental Figure 2. Relationship between angiographically normal coronary arteries and a final diagnosis of myocarditis in a meta-analysis of individual patient data.**

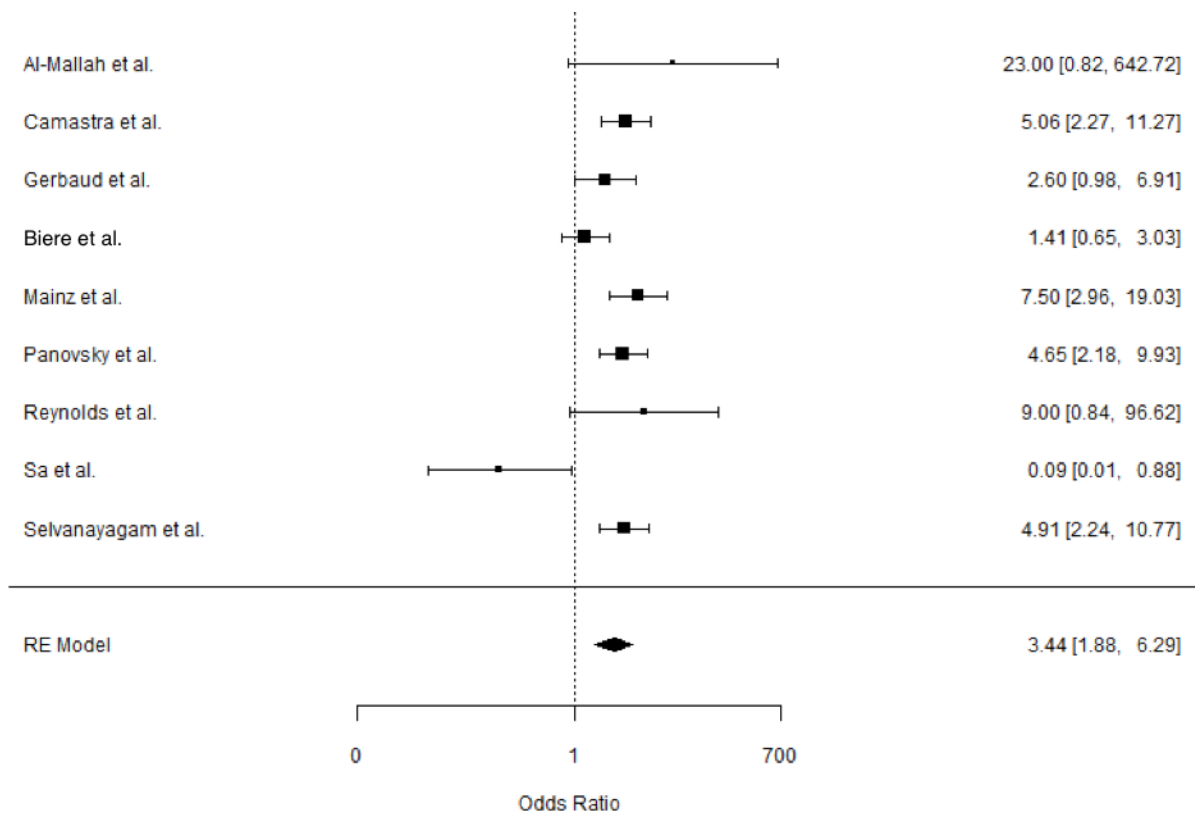

**Supplemental Figure 3. Funnel plot to evaluate for publication bias.** Each dot represents one study.

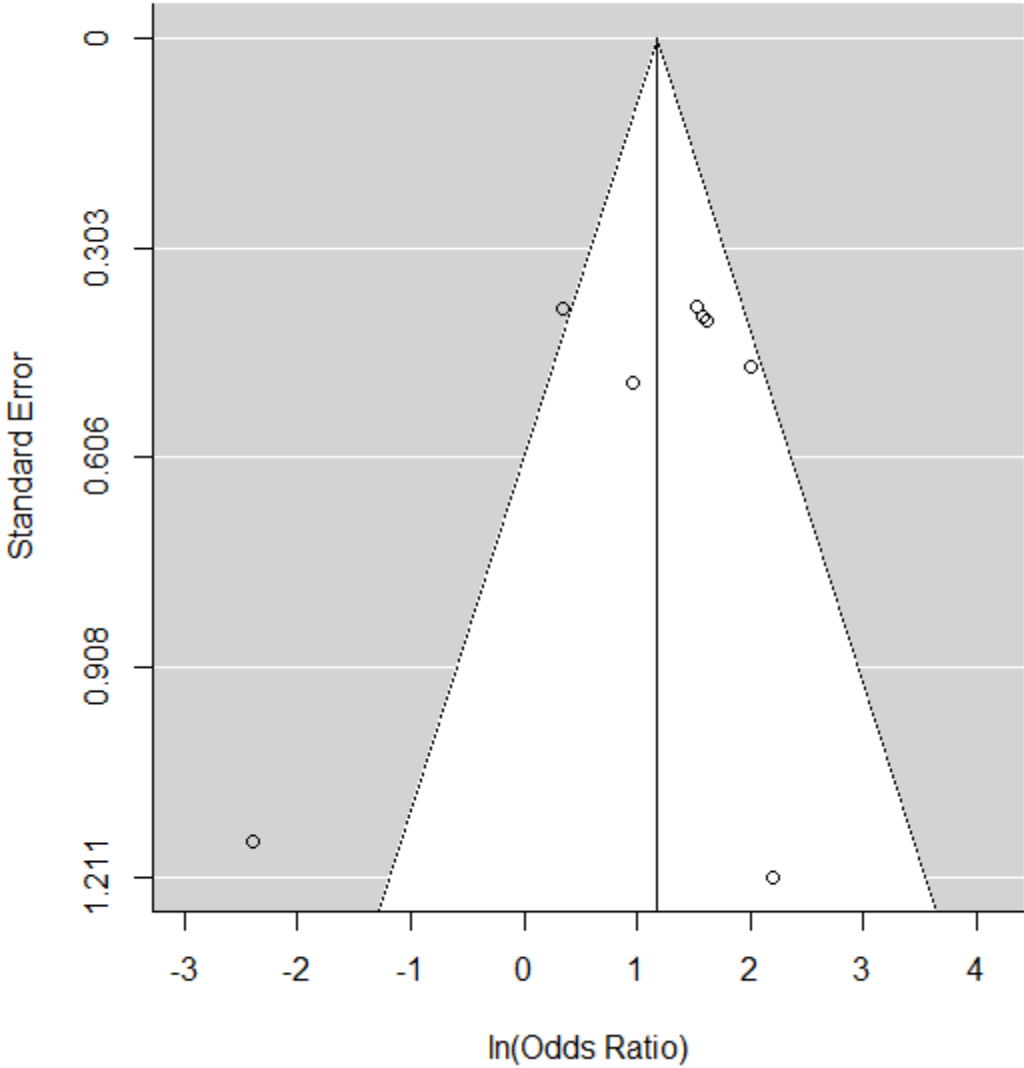

**Supplemental Figure 4. Relationship between angiographically normal coronary arteries and a final diagnosis of myocarditis in a sensitivity analysis including 8 studies.**

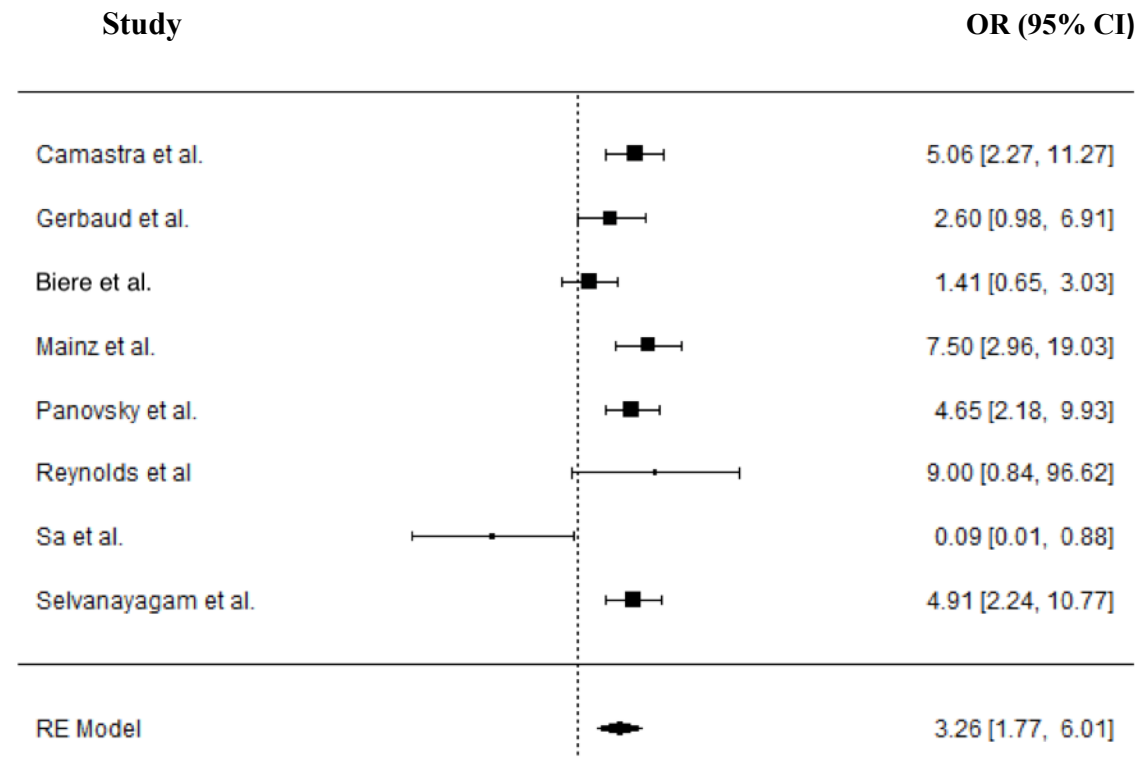

Supplemental Figure 5. Odds of myocarditis by age group, relative to patients age <40 years, among patients with a provisional diagnoses of MINOCA.

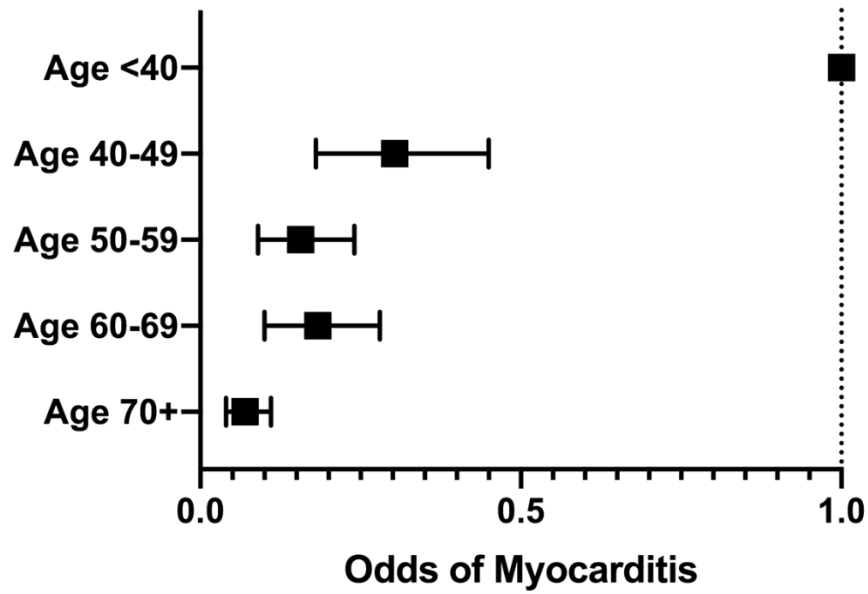

Supplemental Figure 6. Representative CMR images from various sites

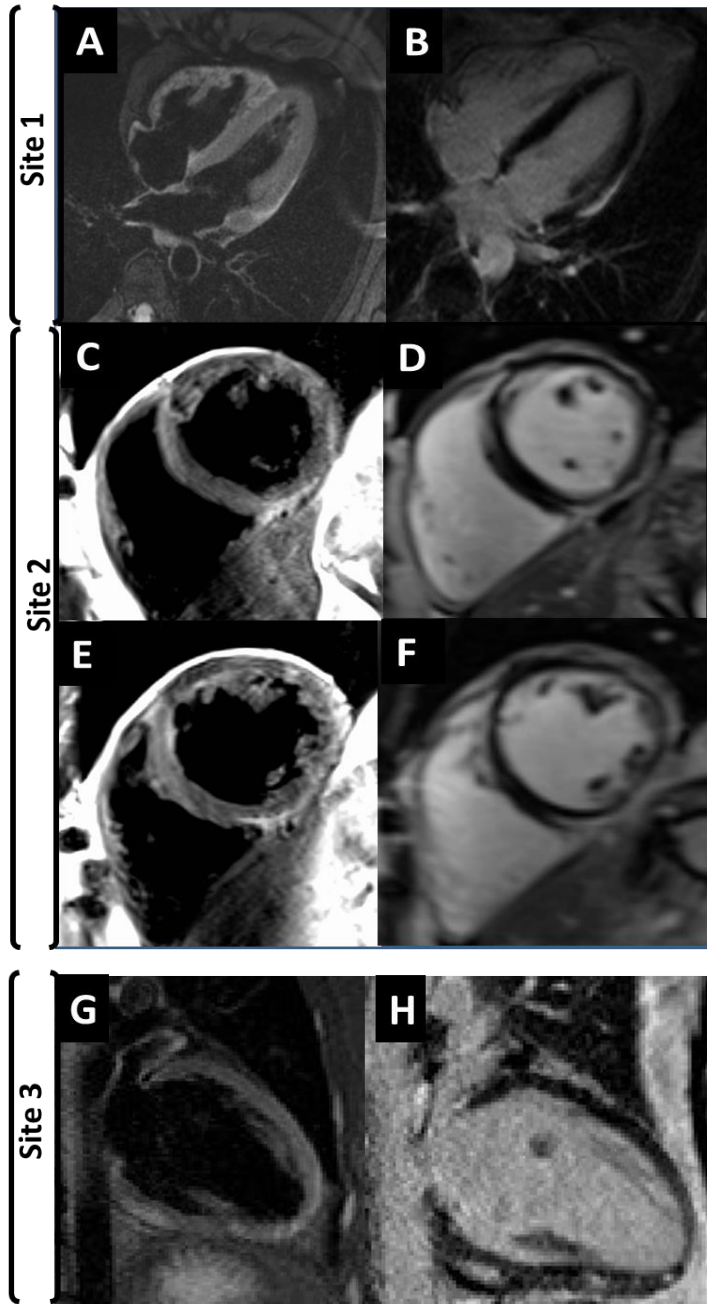

\*\*A: T2 weighted image showing increased signal intensity in the basal lateral wall; B: Late gadolinium sequence with sub-epicardial enhancement in the same location within the basal lateral wall; C & E: T2 weighted images demonstrating increased signal intensity in multiple coronary territories; D and F: Late gadolinium enhanced images showing sub-epicardial enhancement in multiple coronary territories; G: T2 weighted image demonstrating focal edema in the subepicardium of the inferior wall; H: Late gadolinium sequence with epicardial enhancement in the inferior and lateral wall.

## Supplementary Table 1.

| <b>Study</b>        | <b>Number of MINOCA<br/>Patients Enrolled</b> |
|---------------------|-----------------------------------------------|
| Bellenger (2006) *  | 25                                            |
| Christiansen (2006) | 23                                            |
| Assomull (2007)     | 60                                            |
| Boussel (2008) *    | 12                                            |
| Baccouche (2009)    | 82                                            |
| Zaldumbide (2009) * | 80                                            |
| Avegliano (2011)    | 64                                            |
| Chopard (2011) *    | 87                                            |
| Leurent (2011)      | 107                                           |
| Reynolds (2011)     | 50                                            |
| Gerbaud (2012)      | 130                                           |
| Mahmoudi (2012)     | 91                                            |
| Collste (2013)      | 176                                           |
| Alsaileek (2014)    | 26                                            |
| Chu (2015)          | 32                                            |
| Emrich (2015)       | 125                                           |
| Kawecki (2015)      | 75                                            |
| Saba (2015)         | 143                                           |
| Pathik (2016)       | 125                                           |
| Biere (2017)        | 131                                           |
| Camastra (2017)     | 190                                           |
| Dastidar (2017)     | 204                                           |
| Mavrogeni (2017) *  | 78                                            |
| Panovsky (2017)     | 136                                           |
| Montenegro (2018)   | 114                                           |
| Patriki (2018)      | 167                                           |
| Dastidar (2019)     | 388                                           |

\* MINOCA was defined by angiographically normal coronary arteries
